# Supplementary material
Source: publisher site journal article supplement (http://kjim.org/upload/media/kjim-2023-347-Supplementary-Table-2.pdf)
Supplement: Supplementary file 1 [file kjim-2023-347-Supplementary-Table-2.pdf]

**Supplementary Table 2. Treatments related to COVID-19 of the patients with hospital-acquired COVID-19 according to the progression to critical illness**

| Variable                             | Total<br>(n = 204) | Non-critical illness<br>(n = 167) | Critical illness<br>(n = 37) | p value |
|--------------------------------------|--------------------|-----------------------------------|------------------------------|---------|
| Antibiotics                          | 128 (63.1)         | 98 (58.7)                         | 30 (83.3)                    | 0.010   |
| Vasopressor                          |                    | 2 (1.2) <sup>a)</sup>             | 23 (62.2)                    | < 0.001 |
| Neuromuscular blocker                |                    |                                   | 3 (8.1)                      |         |
| Dexamethasone                        | 28 (13.7)          | 13 (7.6)                          | 15 (40.5)                    | < 0.001 |
| Tocilizumab                          | 3 (1.5)            | 3 (1.8)                           | 0 (0)                        | 0.947   |
| Ritonavir-nirmatrelvir               | 9 (4.4)            | 9 (5.3)                           | 0 (0)                        | 0.316   |
| Remdesivir                           | 109 (53.4)         | 79 (47.3)                         | 30 (81.1)                    | < 0.001 |
| Molnupiravir                         | 1 (0.5)            | 1 (0.6)                           | 0 (0)                        | > 0.999 |
| Prone position                       |                    |                                   | 3 (8.1)                      |         |
| Inhaled nitric oxide                 |                    |                                   | 1 (2.7)                      |         |
| Continuous renal replacement therapy |                    |                                   | 5 (13.5)                     |         |
| Extracorporeal membrane oxygenation  |                    |                                   | 0 (0)                        |         |
| High-flow nasal cannula              |                    |                                   | 20 (54.1)                    |         |
| Non-invasive ventilation             |                    |                                   | 1 (2.7)                      |         |
| Mechanical ventilation               |                    |                                   | 9 (24.3)                     |         |

Values are presented as number (%).

COVID-19, coronavirus disease 2019.

<sup>a)</sup>Two non-critical patients received vasopressors: one had hypovolemic shock due to diuretic use, and the other had atrial fibrillation with a rapid ventricular response and low blood pressure that improved after cardioversion.
